# Supplementary material for: African Swine Fever Outbreaks in Lithuanian Domestic Pigs in 2019
Source: MDPI journal article supplement (doi:10.3390/ani12010115), 2022-01-04
Supplement: s1 [file s1]

## QUESTIONNAIR FOR EPIDEMIOLOGICAL INVESTIGATION ON CASE AND CONTROL FARMS

*(sections of the official ASF-outbreak questionnaire, which were not relevant for the present case control study, were omitted)*

Date of visit:

Name of interviewer:

Case farm identification No:

Address:

Control farm identification No:

### I. INFORMATION OF THE HOLDING

#### 1. General information:

Owner of the holding:            legal entity ☐                      natural person ☐

\_\_\_\_\_  
(Name, surname/company name, address)

Contact phone no.: \_\_\_\_\_

Veterinary confirmation No: \_\_\_\_\_

Name(s) and responsibility of interviewed person: \_\_\_\_\_

#### Control farm: Location

Geographic coordinates:

Straight distance (km, one decimal number) to the ASF case farm: \_\_\_\_\_

Type of pig farming:            commercial ☐ non-commercial ☐

#### 2. Herd type:

- |                                                                      |                                              |
|----------------------------------------------------------------------|----------------------------------------------|
| <input type="checkbox"/> Breeding herd                               | <input type="checkbox"/> Mixed-breed herd    |
| <input type="checkbox"/> Fattening herd                              | <input type="checkbox"/> Piglet farming herd |
| <input type="checkbox"/> Herd of other purpose (specialized company) | <input type="checkbox"/> Farrowing herd      |
| <input type="checkbox"/> Sows before farrowing                       | <input type="checkbox"/> Reproductive herd   |
| <input type="checkbox"/> Other (.....)                               |                                              |

#### 4. Swine categories and numbers:

| Category                | Number of pigs |
|-------------------------|----------------|
| Piglets up to 3 months  |                |
| Pigs from 3 to 8 months |                |
| Pigs over 8 months      |                |

|                                                   |  |
|---------------------------------------------------|--|
| Sows (replacement, major, pregnant, not pregnant) |  |
| Boars                                             |  |
| <b>Total</b>                                      |  |

5. Pig holding is registered in the official data base Yes ☐ No ☐

7. Are other animals present on the farm (indicate number for each species): Yes ☐ No ☐ ;

if "Yes" what animals:

- |                                        |                                        |
|----------------------------------------|----------------------------------------|
| <input type="checkbox"/> bovines _____ | <input type="checkbox"/> sheep _____   |
| <input type="checkbox"/> goats _____   | <input type="checkbox"/> poultry _____ |
| <input type="checkbox"/> dogs _____    | <input type="checkbox"/> cats _____    |
| <input type="checkbox"/> horses _____  | <input type="checkbox"/> other _____   |
|                                        | (specify)                              |

- The other animals leave farm territory (Indicate species) \_\_\_\_\_ Yes ☐ No ☐
- Other animals are kept together in the same premise (the same room/space) (Indicate species) \_\_\_\_\_ Yes ☐ No ☐
- Is there a physical barrier (solid walls without holes, gaps and etc.) between pigs and other animals in the building? Yes ☐ No ☐
- Can pigs and other animals have direct contact with each other Yes ☐ No ☐
- Can pigs and animals have indirect contact with each other Yes ☐ No ☐
- Additional information \_\_\_\_\_

7.1 Movement of animals from pasture/forest to farm in the last 4 weeks Yes ☐ No ☐

If yes, which species and purpose \_\_\_\_\_

Every day ☐

Several times per week ☐

Once per week and less ☐

8. Population of rodent (mice, rats):

- |                                                  |                              |                             |
|--------------------------------------------------|------------------------------|-----------------------------|
| Ongoing rodent control                           | <input type="checkbox"/> Yes | <input type="checkbox"/> No |
| - is done by specialized company                 | <input type="checkbox"/> Yes | <input type="checkbox"/> No |
| - is done by owners                              | <input type="checkbox"/> Yes | <input type="checkbox"/> No |
| - high (visible problems with rodents)           | <input type="checkbox"/>     |                             |
| - average (no problems, only signs of rodents)   | <input type="checkbox"/>     |                             |
| - low (rodents and their signs are not observed) | <input type="checkbox"/>     |                             |

Additional information \_\_\_\_\_

9. Cleaning, washing of premises:

- |                                                                  |                          |
|------------------------------------------------------------------|--------------------------|
| almost exclusively dry cleaning                                  | <input type="checkbox"/> |
| washing without using high-pressure water                        | <input type="checkbox"/> |
| washing in cold or hot high-pressure water without disinfectants | <input type="checkbox"/> |

**Cleaning is carried out:**

- periodically (how frequently) daily ☐
- by taking out from the individual or group holdings ☐
- on the "all-in-all-out" basis ☐
- not carried out ☐
- in presence of animals ☐

**Disinfection is carried out:**

- periodically (how frequently) \_\_\_\_\_ ☐
- by taking out from the individual or group holdings ☐
- on the "all-in-all-out" basis ☐
- not carried out ☐
- in presence of animals ☐

**10. Ventilation systems:**

- natural ventilation ☐
- mechanical ventilation ☐
- separate systems by sections of premise Yes ☐ No ☐
- filters Yes ☐ No ☐
- insect nets are installed Yes ☐ No ☐

Additional information about protection of windows, doors and ventilation openings from insects \_\_\_\_\_

---

**11. Collection and storage (before dispatch for utilization) of dead animal in the last 4 weeks:**

Yes ☐ No ☐

**If Yes**

**In closed leakage prove containers** ☐

- ☐ inside a barn or utility room
- ☐ on the premise territory
- ☐ on the edge of premise territory

**Not in containers, openly** ☐

- ☐ inside a barn or utility room
- ☐ on the premise territory
- ☐ on the edge of premise territory

**12. Pig feeding:**

- ☐ fed only non-animal origin feed produced by themselves and purchased
- ☐ fed only non-animal origin feed produced by themselves
- ☐ fed only non-animal origin feed which is purchased
- ☐ green fodder is used (grass, potatoes and etc)
- ☐ fed with purchased feed of animal origin (e. g.: blood, fish meal and etc.)

- ☐ fed with milk of cows (goats, sheep) from own farm
- ☐ feeding with milk processing products or by products from enterprises
- ☐ other feeding practices \_\_\_\_\_

#### 12.1 In-depth information on feeding (diet, technology, feed suppliers):

Whole-meal from own grown grain ☐ Is it steamed Yes ☐ No ☐

Bought whole-meal ☐ Is it steamed Yes ☐ No ☐

Comments \_\_\_\_\_

#### 12.2 Feeding with food waste from canteens or own household kitchen: ☐ Yes ☐ No

if "Yes", is it:

- ☐ heat-treated ☐ not heat treated

#### 12.5 Feed storage:

Specify whether feed and bedding are protected from wild boars ☐ Yes ☐ No

In the same space/room where pigs are kept ☐

In the same building next to pig holding space ☐

In the same pig keeping building, but you have to bring feed from outside the building ☐

Biosecurity is good ☐

Biosecurity is bad ☐

In a separate building with good biosecurity ☐

In a separate building with bad biosecurity ☐

Grain is ground in a pig holding space Yes ☐ No ☐

Other

Comments \_\_\_\_\_

#### 12.6 Beddings: ☐ homemade ☐ acquired or bought

☐ straw ☐ sawdust ☐ No bedding

#### 12.7 Storage place of beddings (other information):

In the same space/room where pigs are kept ☐

In the same building as pigs ☐

In the same pig keeping building, but you have to bring feed from outside the building ☐

Another building:

With good biosecurity ☐

With bad biosecurity ☐

Additional information \_\_\_\_\_

#### 13. Insemination:

- ☐ natural mating
- ☐ artificial insemination with on the farm produced semen
- ☐ artificial insemination with purchased semen
- ☐ insemination is performed by farmer (no service from outside)

☐ other (e.g. mixed) \_\_\_\_\_

**15. Animal purchases and sales within the last 4 weeks:**

**a) purchase:** Yes ☐ No ☐

| Date | Quantity | Age,<br>category | Place of purchase | Herd origin |
|------|----------|------------------|-------------------|-------------|
|      |          |                  |                   |             |
|      |          |                  |                   |             |
|      |          |                  |                   |             |
|      |          |                  |                   |             |

**b) sale:** Yes ☐ No ☐

| Date | Quantity | Age,<br>category | Place of purchase | Herd origin |
|------|----------|------------------|-------------------|-------------|
|      |          |                  |                   |             |
|      |          |                  |                   |             |
|      |          |                  |                   |             |
|      |          |                  |                   |             |

**Movement routes of the purchased pigs:**

- ☐ from seller's farm
- ☐ trader's premises
- ☐ auctions /exhibitions/markets
- ☐ shipment directly from the herd of origin by own transport
- ☐ shipment directly from the herd of origin by means of carriers
- ☐ direct shipment with visiting other herds

**16. Distance from an outbreak to the nearest pig holdings/herds:**

**a)**

| No | Name and address | Distances (km) | If there was a ASF outbreak -<br>distance in km |
|----|------------------|----------------|-------------------------------------------------|
| 1  |                  |                |                                                 |
| 2  |                  |                |                                                 |
|    |                  |                |                                                 |

**b) Distance to the nearest positive wild boar hunted or found dead during the last 6 months:**

| No | Location and coordinates WGS | Distances (km) | Date |
|----|------------------------------|----------------|------|
|    |                              |                |      |
|    |                              |                |      |
|    |                              |                |      |
|    |                              |                |      |

**17. Official veterinary control of the farm**

Yes ☐ No ☐

If "Yes", then:

- ☐ once a year
- ☐ once during the pig fattening period
- ☐ twice a year
- ☐ more often

Date of last visit \_\_\_\_\_

20. Visitors within the last 4 weeks: Yes ☐ No ☐

a) controlling authorities:

- ☐ veterinary services
- ☐ breeding service
- ☐ environmental protection
- ☐ fire protection
- ☐ National Paying Agency
- ☐ other authorities

b) service providers:

- ☐ inseminators
- ☐ carriers
- ☐ feed suppliers
- ☐ technical staff
- ☐ attending/holding veterinarian:

identification No: \_\_\_\_\_

address, tel.: \_\_\_\_\_

c) other persons:

- ☐ animal traders
- ☐ butcher
- ☐ hunter
- ☐ other \_\_\_\_\_

(specify)

The visitor had contact with pigs on the farm Yes ☐ No ☐

The visitors entered pig farm/ area only Yes ☐ No ☐

(specify which visitors had which contacts and date) \_\_\_\_\_

21. Movement of transport to pig farm area for last 4 weeks Yes ☐ No ☐

List of transport that arrived to the farm in the last 4 weeks (dates and purpose)

Was there a sharing of farm transport with other farms in the last 4 weeks Yes ☐ No ☐

Farm transport is used for work in fields/pastures in the last 4 weeks Yes ☐ No ☐

Farm transport is used for work in forests in the last 4 weeks Yes ☐ No ☐

Visiting transport on the farm in forests in the last 4 weeks Yes ☐ No ☐

Comments if answered yes \_\_\_\_\_

22. Other contacts within the last 4 weeks: Yes ☐ No ☐

Possible contact with wild boars Yes ☐ No ☐ \_\_\_\_\_

Common use of machines or parts of machines (e.g. grass or silage choppers) ☐ Yes ☐ No

Sharing of tools/gear with neighbors/friends within the last 4 weeks \_\_\_\_\_ ☐ Yes ☐ No

Other possibilities of the contact:

(specify)

**22.1 Movement of farm personnel to forest in the last 4 weeks**

Yes ☐

No ☐

Purpose of movement \_\_\_\_\_

Once per week ☐

2-3 times per week ☐

More than 3 times per week ☐

Date of last visit \_\_\_\_\_

**22.3 Movement of farm personnel to pastures in the last 4 weeks**

Yes ☐

No ☐

Purpose of movement animal care, works on fields

Once per week ☐

2-3 times per week ☐

More than 3 times per week ☐

Date of last visit \_\_\_\_\_

**22.4 Additional information regarding visitors**

- ☐ there is a hunter among the owners/family, who lives/works on the farm
- ☐ there is a hunter among workers who has contact with pigs
- ☐ there is a hunter among other farm workers with no direct contact with pigs
- ☐ hunters among friends, relatives and etc.,
- ☐ no hunters on farm

**23. ASF historical data:**

a) ASF – was previously detected ☐ Yes ☐ No

Date of confirmation: \_\_\_\_\_

**26. Biosecurity assessment in the holding**

|   | Measure                                 | Comments and observations | Is there a risk? |    |
|---|-----------------------------------------|---------------------------|------------------|----|
|   |                                         |                           | YES              | NO |
|   | External biosecurity                    |                           |                  |    |
| 4 | Fence and gate quality                  |                           |                  |    |
| 5 | Manure keeping place is fenced          |                           |                  |    |
| 6 | Disinfectant barriers (quality and use) |                           |                  |    |
| 7 | Fomites (only for pigs or not)          |                           |                  |    |
| 8 | Appropriate environment (clean and etc) |                           |                  |    |

How reliably can be concluded that disinfection matts, rubber boots and working clothes for biosecurity purposes are maintained in good conditions, are used properly, regularly and that a farmer follows biosecurity requirements (assessment by the reviewer)

| Not reliable | 1 | 2 | 3 | 4 | 5 | 6 | 7 | 8 | 9 | 10 | Reliable |
|--------------|---|---|---|---|---|---|---|---|---|----|----------|
|              |   |   |   |   |   |   |   |   |   |    |          |

## VII. ADDITIONAL INFORMATION

---

---

---

---
